# Supplementary material
Source: PubMed Central journal article supplement (PMC6158534)
Supplement: rspb20181366supp1.pdf [file rspb20181366supp1.pdf]

## Social interactions shape individual and collective personality in social spiders Supplementary material

### Further information on group compositions

After the first week of our study, the average boldness of all group compositions converged, with the 'all bold' groups reducing their average boldness substantially (Figure S1). We used a one-way ANOVA to compare mean group boldness of the three different group compositions, for the latter six weeks of our experiment, excluding week one. We did not detect a significant difference in average boldness between the three compositions for the latter six weeks ( $F(2,141)=1.335$ ,  $p=0.27$ , Figure S1).

### Average group-level boldness by initial group composition

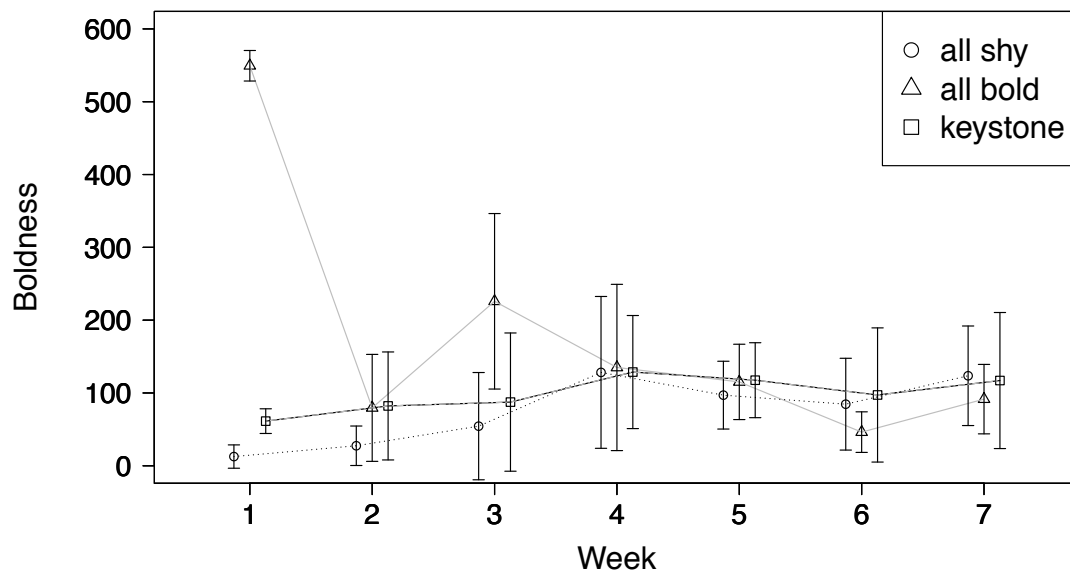

**Figure S1:** Mean group boldness by initial boldness composition. Error bars indicate standard deviation. There were N=9 groups of all shy spiders, N=5 groups of all bold, and N=10 keystone groups (i.e., all shy with one bold).

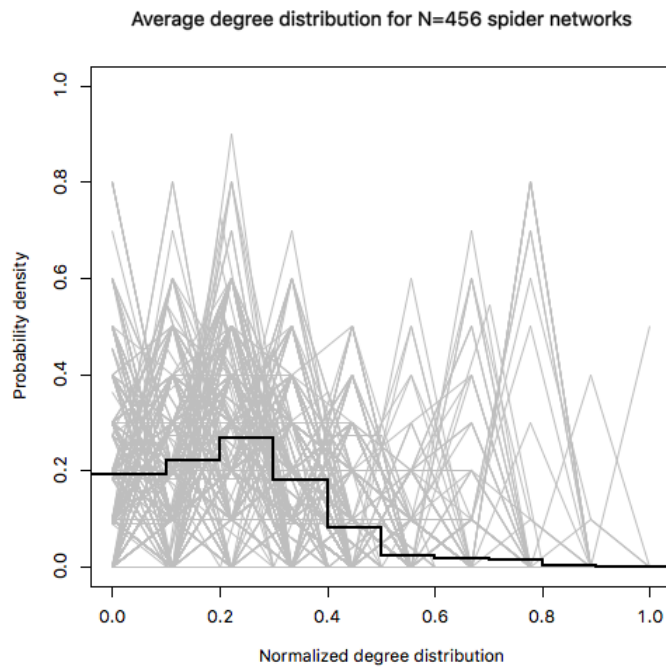

**Figure S2:** Average degree distribution across all N=456 networks is shown as the black line. Because the range of the degree distribution depends on the group size, it is normalized to 0-1 for comparability, where 1 is the maximum degree (N-1). The average distribution is unimodal, with most spiders having a normalized degree of 0.1-0.4 (for 10 spiders, 0.9-3.6 physical interactions).

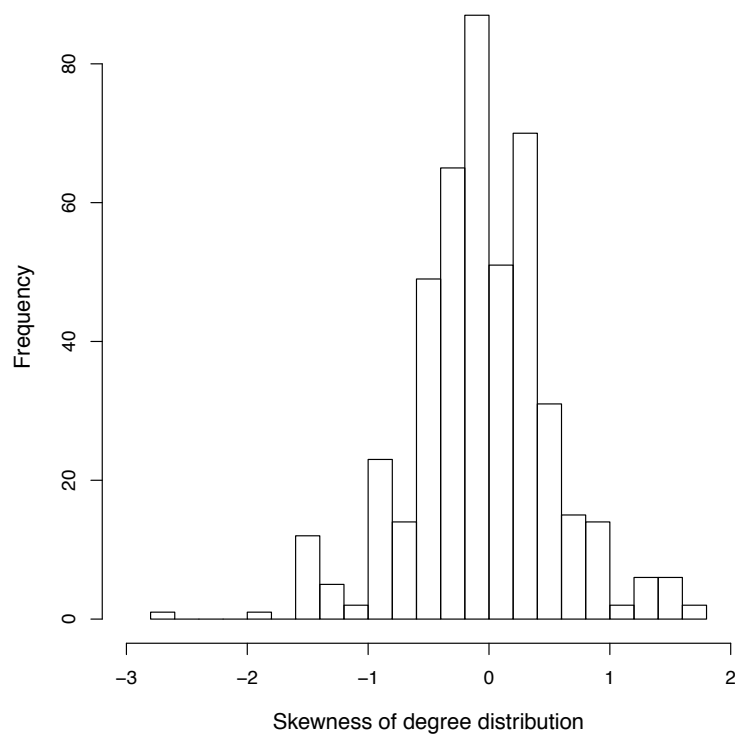

**Figure S3.** The skewness of the networks' degree distribution is centered around zero (mean = -0.046)

**Table S1.** The 24 spider groups were aggregated into 8 SAOM models as specified here.

| Source colony | Group ID | Initial boldness composition | SAOM model number |
|---------------|----------|------------------------------|-------------------|
| BR10          | BR10-1   | All bold                     | 1                 |
|               | BR10-2   |                              |                   |
|               | BR10-10  |                              |                   |
| BR13          | BR13-5   | All bold                     | 2                 |
|               | BR13-9   |                              |                   |
| BR10          | BR10-3   | Keystone                     | 3                 |
|               | BR10-4   |                              |                   |
|               | BR10-5   |                              |                   |
|               | BR10-9   |                              |                   |
| BR13          | BR13-1   | Keystone                     | 4                 |
|               | BR13-2   |                              |                   |
|               | BR13-6   |                              |                   |
| BR3           | BR3-2    | Keystone                     | 5                 |
|               | BR3-3    |                              |                   |
|               | BR3-4    |                              |                   |
| BR10          | BR10-6   | All shy                      | 6                 |
|               | BR10-7   |                              |                   |
|               | BR10-8   |                              |                   |
| BR13          | BR13-3   | All shy                      | 7                 |
|               | BR13-4   |                              |                   |
|               | BR13-7   |                              |                   |
|               | BR13-8   |                              |                   |
| BR3           | BR3-1    | All shy                      | 8                 |
|               | BR3-5    |                              |                   |
