# Supplementary material
Source: PubMed Central journal article supplement (PMC6158534)
Supplement: rspb20181366supp2.pdf [file rspb20181366supp2.pdf]

**Table S2. SAOM model parameter values, meta-analysis and post-hoc goodness-of-fit test results**

Final models were run with number of subphases in phase 2, nsub=6, and number of runs in phase 3, n3=6000  
 For good model fit, need tconv.max < 0.25, and 4x post-hoc GOF tests p > 0.01

**(a) Parameter values and meta-analysis**

| Source colony                                    | Treatment  | Groups | Overall fit |              |         | Degree act + pop |         |        | Jaccard similarity |        |         | from.w.ind |         | Boldness ego & alt |         | Bold linear |         | Bold quadratic |         | Average alter effect |      |
|--------------------------------------------------|------------|--------|-------------|--------------|---------|------------------|---------|--------|--------------------|--------|---------|------------|---------|--------------------|---------|-------------|---------|----------------|---------|----------------------|------|
|                                                  |            |        | tconv.max   | Density Mean | s.e.    | Mean             | s.e.    | Mean   | s.e.               | Mean   | s.e.    | Mean       | s.e.    | Mean               | s.e.    | Mean        | s.e.    | Mean           | s.e.    | Mean                 | s.e. |
|                                                  | 1 all bold | 3      | 0.0816      | 0.3313       |         | 0.2781           | -0.2203 | 0.0409 | 2.5424             | 0.5388 | 0.1196  | 0.0478     | -0.0816 | 0.0401             | -1.2921 | 0.1922      | 0.4914  | 0.3144         | 1.0681  | 0.504                |      |
|                                                  | 2 all bold | 2      | 0.0778      | -0.9900      |         | 0.2079           | -0.0772 | 0.03   | 4.4013             | 0.4171 | 0.029   | 0.0145     | 0.0079  | 0.0469             | -1.4076 | 0.261       | 0.3874  | 0.3535         | 0.4872  | 0.8307               |      |
|                                                  | 1 keystone | 4      | 0.1262      | -0.2240      |         | 0.1981           | -0.1449 | 0.0289 | 3.0195             | 0.3283 | 0.0756  | 0.0159     | 0.0809  | 0.0459             | -2.1259 | 0.2189      | 1.0814  | 0.1866         | 0.0252  | 0.5894               |      |
|                                                  | 2 keystone | 4      | 0.107       | 0.1910       |         | 0.3371           | -0.2291 | 0.0454 | 3.484              | 0.4199 | 0.1135  | 0.0297     | 0.0853  | 0.0466             | -1.8654 | 0.3848      | 0.5062  | 0.1088         | -1.2969 | 2.1981               |      |
|                                                  | 3 keystone | 3      | 0.1157      | 0.0725       |         | 0.2889           | -0.1855 | 0.0364 | 3.2216             | 0.4938 | 0.0918  | 0.029      | -0.0171 | 0.0481             | -2.4788 | 0.3134      | 1.2565  | 0.2426         | 0.9325  | 0.7006               |      |
|                                                  | 1 all shy  | 3      | 0.0939      | -0.2699      |         | 0.2241           | -0.1423 | 0.0307 | 3.4944             | 0.4482 | 0.0661  | 0.0246     | 0.0304  | 0.0429             | -2.3475 | 0.3039      | 1.2662  | 0.2513         | 0.8995  | 0.4702               |      |
|                                                  | 2 all shy  | 3      | 0.0874      | -0.2345      |         | 0.2094           | -0.1734 | 0.0304 | 3.7606             | 0.3244 | 0.0824  | 0.0205     | -0.0041 | 0.0703             | -3.6575 | 0.4952      | 1.5912  | 0.3226         | 0.6886  | 1.0723               |      |
|                                                  | 3 all shy  | 2      | 0.0796      | -0.2190      |         | 0.2975           | -0.1591 | 0.0445 | 3.1215             | 0.5017 | 0.0866  | 0.0364     | 0.0011  | 0.0698             | -3.506  | 0.4798      | 1.7168  | 0.3232         | 0.7411  | 0.8996               |      |
| Mean & s.e., normality assumption                |            |        |             |              | -0.2063 | 0.1379           | -0.16   | 0.016  | 3.4278             | 0.1762 | 0.0735  | 0.0108     | 0.0126  | 0.0212             | -2.2516 | 0.2699      | 1.0191  | 0.1619         | 0.7118  | 0.2416               |      |
| IWLS modification of Snijders & Baerveldt (2003) |            |        |             |              | -0.2031 | 0.1444           | -0.1607 | 0.017  | 3.4229             | 0.1909 | 0.073   | 0.0104     | 0.0126  | 0.0209             | -2.2664 | 0.3001      | 1.0233  | 0.1775         | 0.7118  | 0.164                |      |
| two-sided p (normality)                          |            |        |             |              | 0.178   |                  | < 0.001 |        | < 0.001            |        | < 0.001 |            | 0.57    |                    | < 0.001 |             | < 0.001 |                | 0.022   |                      |      |
| two-sided p (IWLS)                               |            |        |             |              | 0.203   |                  | < 0.001 |        | < 0.001            |        | < 0.001 |            | 0.566   |                    | < 0.001 |             | < 0.001 |                | 0.003   |                      |      |

**(b) Goodness of fit test results**

Monte Carlo Mahalanobis distance test p-values  
 One tailed test used (i.e. estimated probability of greater distance than observation).  
 Calculated joint MHD

Boldness does not have an effect on the likelihood of forming (or avoiding) ties with other spiders

Social interactions increase boldness, on average

| Source colony | Treatment  | Groups | Outdegree Distribution |       | Geodesic Distribution |       | Triad Census |       | Behavior Distribution |       |
|---------------|------------|--------|------------------------|-------|-----------------------|-------|--------------|-------|-----------------------|-------|
|               |            |        | Joint MHD              | p     | Joint MHD             | p     | Joint MHD    | p     | Joint MHD             | p     |
|               | 1 all bold | 3      | 91.52                  | 0.893 | 73.41                 | 0.884 | 54.07        | 0.996 | 153.54                | 1     |
|               | 2 all bold | 2      | 498.07                 | 0.281 | 132.07                | 0.694 | 121.59       | 0.991 | 142.3                 | 1     |
|               | 1 keystone | 4      | 912.77                 | 0.055 | 195.09                | 0.555 | 238.41       | 0.962 | 90.3                  | 1     |
|               | 2 keystone | 4      | 3418.98                | 0.242 | 119.28                | 0.025 | 195.69       | 0.972 | 163.1                 | 0.054 |
|               | 3 keystone | 3      | 253.42                 | 0.203 | 110.26                | 0.134 | 78.97        | 0.99  | 99.4                  | 1     |
|               | 1 all shy  | 3      | 205.08                 | 0.334 | 91.56                 | 0.851 | 59.26        | 0.997 | 75.28                 | 1     |
|               | 2 all shy  | 3      | 1136.37                | 0.108 | 134.61                | 0.012 | 113.46       | 0.959 | 107.36                | 1     |
|               | 3 all shy  | 2      | 308.55                 | 0.089 | 86.46                 | 0.978 | 70.53        | 0.998 | 67.55                 | 1     |
